# Supplementary material
Source: PubMed Central journal article supplement (PMC4152804)
Supplement: CJN.01150114_CJN01150114SupplementaryData.pdf [file CJN.01150114_CJN01150114SupplementaryData.pdf]

## **Affiliations:**

### **Oleh M. Akchurin**

Department of Pediatrics, Albert Einstein College of Medicine and Children's Hospital at Montefiore, Bronx, New York

### **Michael F. Schneider**

Department of Epidemiology, Johns Hopkins Bloomberg School of Public Health, Baltimore, Maryland

### **Lucy Mulqueen**

Department of Epidemiology, Johns Hopkins Bloomberg School of Public Health, Baltimore, Maryland

### **Ellen R. Brooks**

Department of Pediatric Kidney Diseases, Northwestern University Feinberg School of Medicine and Ann & Robert H. Lurie Children's Hospital of Chicago, Chicago, Illinois

### **Craig B. Langman**

Department of Pediatric Kidney Diseases, Northwestern University Feinberg School of Medicine and Ann & Robert H. Lurie Children's Hospital of Chicago, Chicago, Illinois

### **Larry A. Greenbaum**

Department of Pediatrics, Emory University and Children's Healthcare of Atlanta, Atlanta, Georgia

### **Susan L. Furth**

Department of Pediatrics, University of Pennsylvania Perelman School of Medicine and Children's Hospital of Philadelphia, Philadelphia, Pennsylvania

### **Marva Moxey-Mims**

Pediatric Nephrology and Renal Centers Programs, National Institute of Diabetes and Digestive and Kidney Diseases, Bethesda, Maryland

### **Bradley A. Warady**

Department of Pediatrics, University of Missouri-Kansas City School of Medicine and Children's Mercy Hospital, Kansas City, Missouri

### **Frederick J. Kaskel**

Department of Pediatrics, Albert Einstein College of Medicine and Children's Hospital at Montefiore, Bronx, New York

### **Amy L. Skversky**

Department of Pediatrics, Albert Einstein College of Medicine and Children's Hospital at Montefiore, Bronx, New York
